# Supplementary material
Source: PubMed Central journal article supplement (PMC3922471)
Supplement: hesr0049-0153-sd2.pdf [file hesr0049-0153-sd2.pdf]

Appendix Table: Trends in PCI volume by dataset and diagnosis

|                                    | Year    |         |         |         |         |         |         |         |        | Total   | % Change,<br>2006-2008 |
|------------------------------------|---------|---------|---------|---------|---------|---------|---------|---------|--------|---------|------------------------|
|                                    | 2001    | 2002    | 2003    | 2004    | 2005    | 2006    | 2007    | 2008    | 2009   |         |                        |
| National Hospital Discharge Survey |         |         |         |         |         |         |         |         |        |         |                        |
| Stable angina/Other                |         |         |         |         |         |         |         |         |        |         |                        |
| Procedures, unweighted             | 693     | 1,017   | 1,208   | 1,389   | 1,319   | 1,359   | 968     | 525     |        | 8,478   |                        |
| Procedures, weighted               | 78,787  | 121,915 | 138,607 | 138,029 | 130,459 | 137,493 | 115,327 | 83,857  |        |         | -39.0                  |
| Proportion male                    | 0.66    | 0.65    | 0.66    | 0.69    | 0.70    | 0.68    | 0.69    | 0.70    |        |         | 2.6                    |
| Average age                        | 66.5    | 64.5    | 65.1    | 66.5    | 64.3    | 65.9    | 66.6    | 66.7    |        |         | 1.2                    |
| AMI/Unstable angina                |         |         |         |         |         |         |         |         |        |         |                        |
| Procedures, unweighted             | 5,114   | 4,820   | 4,502   | 5,989   | 6,003   | 5,306   | 4,498   | 2,050   |        | 38,282  |                        |
| Procedures, weighted               | 488,374 | 529,371 | 521,625 | 529,027 | 527,949 | 499,948 | 429,330 | 439,017 |        |         | -12.2                  |
| Proportion male                    | 0.66    | 0.66    | 0.64    | 0.65    | 0.68    | 0.64    | 0.66    | 0.65    |        |         | 0.6                    |
| Average age                        | 64.1    | 63.7    | 64.4    | 64.4    | 64.1    | 64.1    | 63.6    | 64.1    |        |         | 0.0                    |
| FL, MD, NJ: SID and SASD           |         |         |         |         |         |         |         |         |        |         |                        |
| Stable angina/Other                |         |         |         |         |         |         |         |         |        |         |                        |
| Procedures                         |         |         |         |         |         | 47,863  | 39,559  | 39,041  | 37,754 | 164,217 | -18.4                  |
| Proportion male                    |         |         |         |         |         | 0.672   | 0.667   | 0.66    | 0.674  |         | -1.8                   |
| Average age                        |         |         |         |         |         | 66.7    | 66.6    | 66.7    | 66.9   |         | 0.0                    |
| Unstable angina                    |         |         |         |         |         |         |         |         |        |         |                        |
| Procedures                         |         |         |         |         |         | 22,066  | 18,640  | 18,356  | 16,474 | 75,536  | -16.8                  |
| Proportion male                    |         |         |         |         |         | 0.64    | 0.64    | 0.65    | 0.68   |         | 2.1                    |
| Average age                        |         |         |         |         |         | 65.8    | 65.9    | 65.9    | 66.2   |         | 0.1                    |
| AMI                                |         |         |         |         |         |         |         |         |        |         |                        |
| Procedures                         |         |         |         |         |         | 30,287  | 29,131  | 30,199  | 30,630 | 120,247 |                        |
| Proportion male                    |         |         |         |         |         | 0.64    | 0.64    | 0.65    | 0.66   |         |                        |
| Average age                        |         |         |         |         |         | 65.8    | 65.9    | 65.9    | 66.4   |         |                        |

Appendix Table (continued): Trends in PCI volume by dataset and diagnosis

|                             | Year |      |      |      |        |        |        |        |       | Total   | % Change,<br>2006-2008 |
|-----------------------------|------|------|------|------|--------|--------|--------|--------|-------|---------|------------------------|
|                             | 2001 | 2002 | 2003 | 2004 | 2005   | 2006   | 2007   | 2008   | 2009  |         |                        |
| Hospital Episode Statistics |      |      |      |      |        |        |        |        |       |         |                        |
| Stable angina/Other         |      |      |      |      |        |        |        |        |       |         |                        |
| Procedures                  |      |      |      |      | 35,928 | 36,819 | 38,042 | 37,021 | 8,918 | 156,728 | 0.5                    |
| Proportion male             |      |      |      |      | 0.73   | 0.73   | 0.73   | 0.74   | 0.74  |         | 0.8                    |
| Average age                 |      |      |      |      | 64.1   | 64.3   | 64.6   | 64.9   | 65.1  |         | 0.9                    |
| Unstable angina             |      |      |      |      |        |        |        |        |       |         |                        |
| Procedures                  |      |      |      |      | 6,100  | 6,841  | 6,917  | 7,119  | 1,701 | 28,678  | 4.1                    |
| Proportion male             |      |      |      |      | 0.71   | 0.71   | 0.71   | 0.70   | 0.72  |         | -1.3                   |
| Average age                 |      |      |      |      | 64.5   | 64.1   | 64.5   | 64.7   | 64.9  |         | 0.9                    |
| AMI                         |      |      |      |      |        |        |        |        |       |         |                        |
| Procedures                  |      |      |      |      | 10,553 | 13,519 | 15,705 | 17,694 | 4,485 | 61,956  | 30.9                   |
| Proportion male             |      |      |      |      | 0.74   | 0.75   | 0.74   | 0.74   | 0.74  |         | -1.1                   |
| Average age                 |      |      |      |      | 62.9   | 63.1   | 63.0   | 63.4   | 63.8  |         | 0.5                    |
